# Supplementary material for: Redox tuning of cytochrome b562 through facile metal porphyrin substitution
Source: Royal Society of Chemistry journal article supplement (doi:10.1039/c2cc34302a), 2012-01-01
Supplement: c2cc34302a.pdf [file c2cc34302a.pdf]

# Chemical Communications

## SUPPLEMENTARY INFORMATION

### Redox tuning of cytochrome $b_{562}$ through facile metal porphyrin substitution

Eduardo Antonio Della Pia,<sup>a, b</sup> Qijin Chi,<sup>c</sup> Martin Elliott,<sup>b</sup> J. Emyr Macdonald,<sup>b</sup> Jens Ulstrup,<sup>c</sup> D. Dafydd Jones,<sup>\*a</sup>

#### Materials and Methods

**Sample preparation.** Construction of the Asp50 to Cys mutant (D50C) of cyt  $b_{562}$  has been described previously.<sup>1</sup> Apo-cyt  $b_{562}$  D50C was extracted from the periplasmic fraction of *E. coli* and purified as outlined previously.<sup>1</sup>

Copper protoporphyrin IX (Cu-PP) and zinc protoporphyrin IX (Zn-PP) were purchased from Santa Cruz biotechnology, Inc. US. The molecules were dissolved in 1 M NaOH prior to use. To avoid molecular aggregation and photodegradation, Zn-PP and Cu-PP solutions were stored in the dark, kept at 4 °C and centrifuged prior experiments. To reconstitute holo-cyt  $b_{562}$  with different metalloporphyrins, excess of protoporphyrin (~ 10 molar equivalents) was added to apo-cyt  $b_{562}$  D50C in 10 mM phosphate buffer pH 6.2. The mixture was then incubated in the dark at 4 °C overnight and purified using centrifugal filters (3kDa cut-off). The purity of the resulting samples was verified through SDS-PAGE analysis (Figure S1). Only a single band was observed that corresponds to the molecular weight of cyt  $b_{562}$  D50C (12 kDa).<sup>2</sup>

**Absorption and circular dichroism spectroscopy.** UV-Vis absorption spectra were measured on a Hewlett-Packard (HP) 8450A diode array UV-Vis spectrophotometer at 25 °C. Apo-cyt  $b_{562}$  D50C concentration was determined by measuring the absorbance at 280 nm (extinction coefficient 3.0 mM<sup>-1</sup> cm<sup>-1</sup>).<sup>2</sup> Cu-PP and Zn-PP affinity for cyt  $b_{562}$  D50C were performed as described previously.<sup>1</sup> CD spectroscopy was performed in 1.0 cm path length quartz cuvettes on a Jasco J-710 spectropolarimeter. Spectra were collected from 190 to 250 nm with a response time of 1 s and an increment of 0.2 nm. The reported spectra are the average of 5 scans. Base lines obtained from samples containing only buffer were subtracted from all the data reported.

**Electrochemical measurements.** Au(111) electrodes were electrochemically etched in 1 M H<sub>2</sub>SO<sub>4</sub> and washed with 1 M HCl and water, then annealed for 8 hours at 880 °C.<sup>3, 4</sup> Prior to protein deposition the electrodes were annealed with a H<sub>2</sub> flame and the Au(111) single crystal surface was protected with hydrogen saturated water. The electrodes were subsequently incubated in 50-60 μM protein solution at 4 °C overnight. Prior to undertaking the experiments the electrodes were rinsed with water to remove the non-chemically adsorbed molecules. The

proteins were checked for stability by measuring the UV-Vis spectra before and after the incubation. Electrochemical measurements were performed using an Autolab potentiostat (Eco Chemie, Netherlands) controlled by a general purpose electrochemical software package (GPES). Cyclic voltammetry experiments were carried out in a single-compartment glass cell consisting of a gold working electrode, a platinum wire gaze auxiliary electrode, and a freshly realized reversible hydrogen reference electrode (RHE). The RHE potential was measured against SCE potential at the end of each experiment and the obtained values used to correct the measured potentials. A constant gas stream of purified Argon was flowed through the electrochemical cell prior and during the experiments to generate an inert atmosphere. The sample was allowed to equilibrate for 5 minutes in the same buffer as the protein, 10 mM phosphate buffer pH 6.2.

#### Results

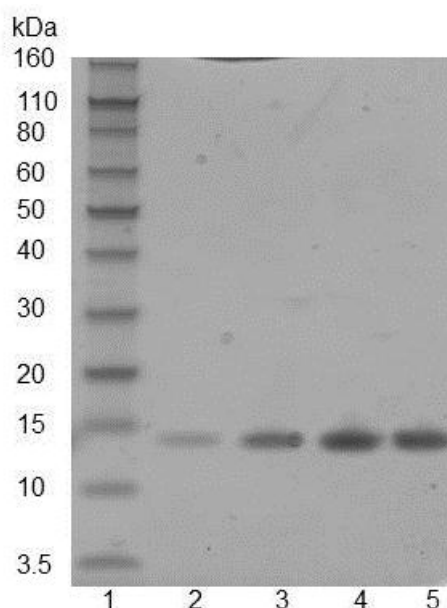

Figure S1. SDS-PAGE analysis of D50C cyt  $b_{562}$ . Lane 1, protein molecular weight standards; lane 2 apo-cyt  $b_{562}$  D50C; lane 3 D50C cyt  $b_{562}$  reconstructed with heme; lane 4 D50C cyt  $b_{562}$  reconstructed with Cu-PP; lane 5 D50C cyt  $b_{562}$  reconstructed with Zn-PP.

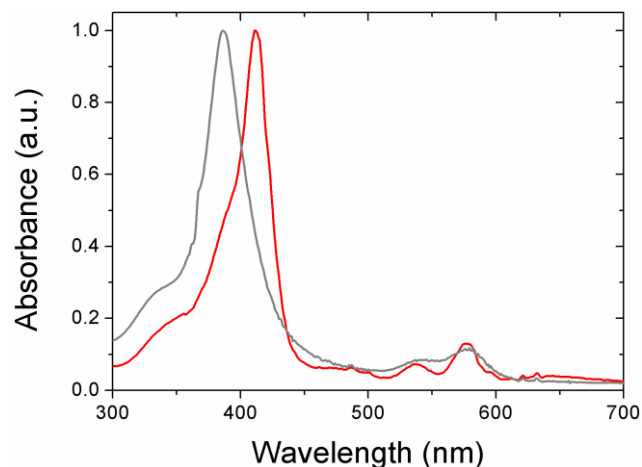

Figure S2. Normalized UV-Vis spectrum of 20  $\mu\text{M}$  of Cu-PP alone (grey line) or 20  $\mu\text{M}$  cyt  $b_{562}$  D50C reconstructed with 20  $\mu\text{M}$  Cu-PP (red line). All spectra were recorded in 10 mM phosphate buffer pH 6.2.

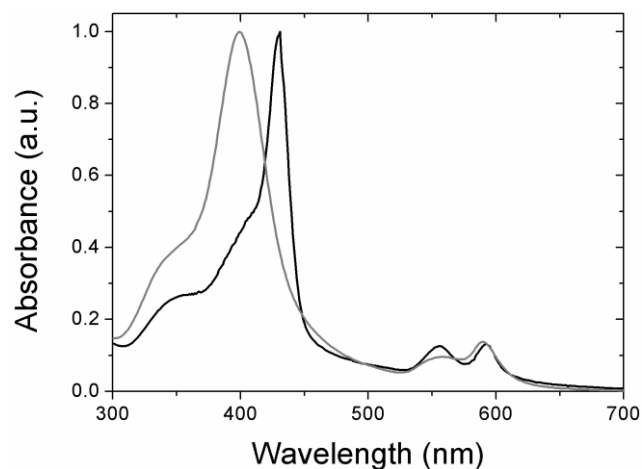

Figure S3. Normalized UV-Vis spectrum of either 20  $\mu\text{M}$  of Zn-PP alone (grey line) or 20  $\mu\text{M}$  cyt  $b_{562}$  D50C reconstructed with 20  $\mu\text{M}$  Zn-PP (black line). All spectra were recorded in 10 mM phosphate buffer pH 6.2.

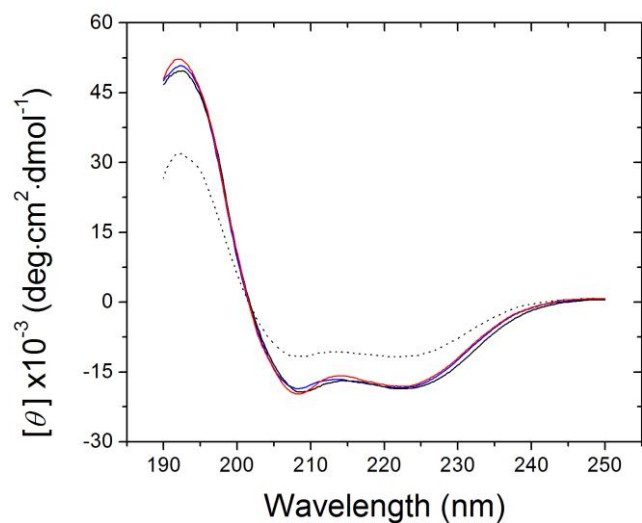

Figure S4. Far UV circular dichroism spectra of apo-cyt  $b_{562}$  D50C (dotted line), cyt  $b_{562}$  D50C reconstructed with heme (blue), Cu-PP (red) and Zn-PP (black) in 10 mM phosphate buffer pH 6.2 at 25°C. The proteins concentrations were 10  $\mu\text{M}$ .

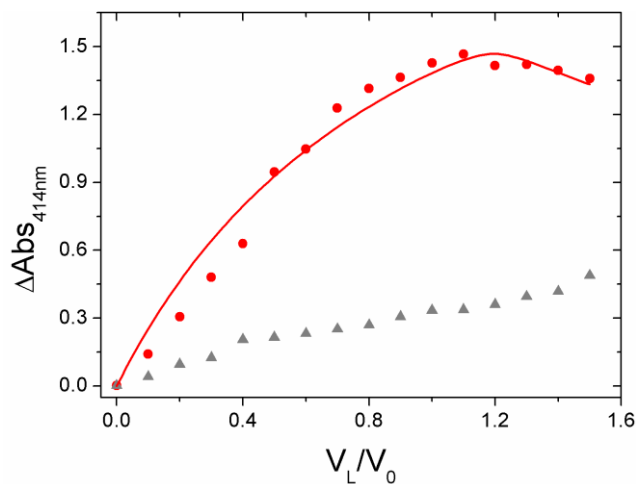

Figure S5. Spectrophotometric titration of apo-cyt  $b_{562}$  D50C with Cu-PP (red). Aliquots of Cu-PP sampling a final concentration range of 0 to 15  $\mu\text{M}$  were titrated into 1 ml of 20  $\mu\text{M}$  apo-cyt  $b_{562}$  D50C in 10 mM phosphate buffer pH 6.2. A blank (grey) titration of Cu-PP into buffer is also shown (grey). Error bars are not shown to improve the clarity of the figure.

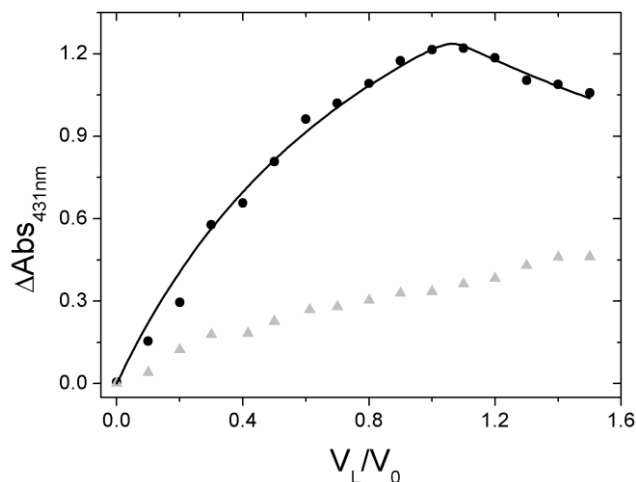

Figure S6. Spectrophotometric titration of apo-cyt  $b_{562}$  D50C with Zn-PP (red). Aliquots of Zn-PP sampling a final concentration range of 0 to 15  $\mu\text{M}$  were titrated into 1 ml of 20  $\mu\text{M}$  apo-cyt  $b_{562}$  D50C in 10 mM phosphate buffer pH 6.2. A blank (grey) titration of Cu-PP into buffer is also shown (grey). Error bars are not shown to improve the clarity of the figure.

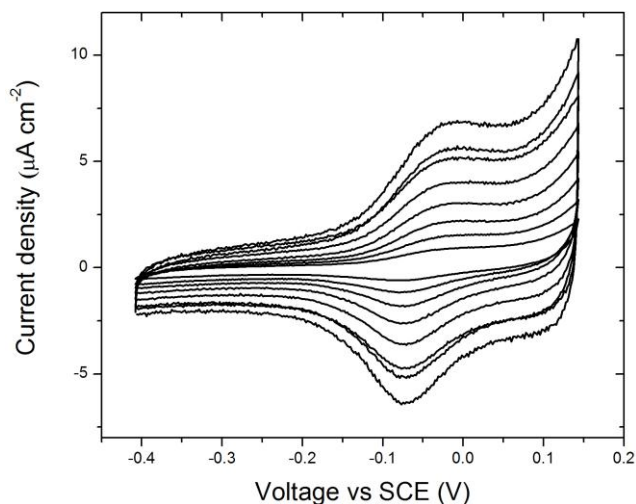

Figure S7. Cyclic voltammetry of Cu-PP in 10 mM phosphate buffer pH 6.2 at various scan rates (from 0.1  $\text{Vs}^{-1}$  to 0.9  $\text{Vs}^{-1}$ ). For performing the experiment 1 ml of 100  $\mu\text{M}$  Cu-PP in 0.1 M NaOH were dissolved in 5 ml of 10 mM phosphate buffer pH 6.2.

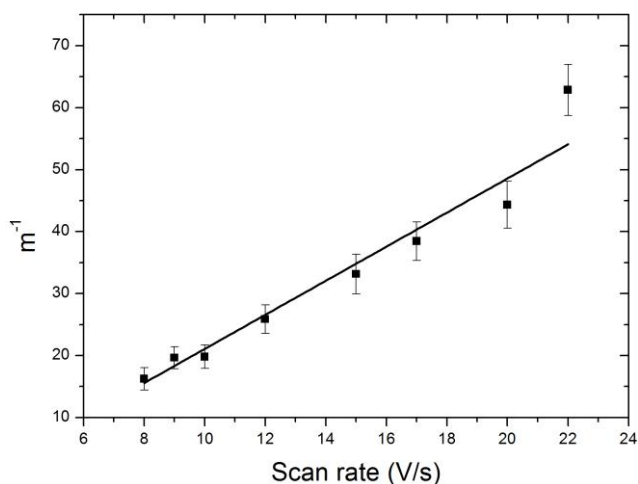

Figure S8. Plot of  $m^{-1}$  versus scan rate. The  $m$  values were obtained from the peak separations in the cyclic voltammograms. The solid curve is the best linear fit of the experimental data

## Notes and references

<sup>a</sup> School of Biosciences, Main Building, Cardiff University, Cardiff CF10 3AT, UK; E-mail: jonesdd@cardiff.ac.uk.

<sup>b</sup> School of Physics and Astronomy, Queens' Building, Cardiff University, Cardiff CF24 3AA, UK.

<sup>c</sup> Department of Chemistry and NanoDTU, Technical University of Denmark, DK-2800 Lyngby, Denmark.

[1] E. A. Della Pia, Q. Chi, D. D. Jones, J. E. Macdonald, J. Ulstrup and M. Elliott, *Nano Lett.*, 2011, **11**, 176-182.

[2] Y. Feng, S. G. Sligar and A. J. Wand, *Nat. Struct. Biol.*, 1994, **1**, 30-35.

[3] A. Hamelin and A.M. Martins, *J. Electroanal. Chem.*, 1996, **407**, 13-21.

[4] J. Clavilier, R. Faure, G. Guinet, R. Durand, *J. Electroanal.*

*Chem.*, 1979, **1**, 198- 205.
